# Supplementary material for: High-impact FN1 mutation decreases chondrogenic potential and affects cartilage deposition via decreased binding to collagen type II
Source: PubMed Central journal article supplement — Sci Adv. 2021 Nov 5;7(45):eabg8583. doi: 10.1126/sciadv.abg8583 (PMC8570604; doi:10.1126/sciadv.abg8583), 2021-11-05
Supplement: sciadv.abg8583_sm.pdf [file sciadv.abg8583_sm.pdf]

Supplementary Materials for

**High-impact *FNI* mutation decreases chondrogenic potential and affects cartilage deposition via decreased binding to collagen type II**

Marcella van Hoolwerff, Alejandro Rodríguez Ruiz, Marga Bouma, H. Eka D. Suchiman, Roman I. Koning, Carolina R. Jost, Aat A. Mulder, Christian Freund, Farshid Guilak, Yolande F.M. Ramos, Ingrid Meulenbelt\*

\*Corresponding author. Email: [i.meulenbelt@lumc.nl](mailto:i.meulenbelt@lumc.nl)

Published 5 November 2021, *Sci. Adv.* 7, eabg8583 (2021)  
DOI: [10.1126/sciadv.abg8583](https://doi.org/10.1126/sciadv.abg8583)

**This PDF file includes:**

Figs. S1 to S4  
Tables S1 to S6

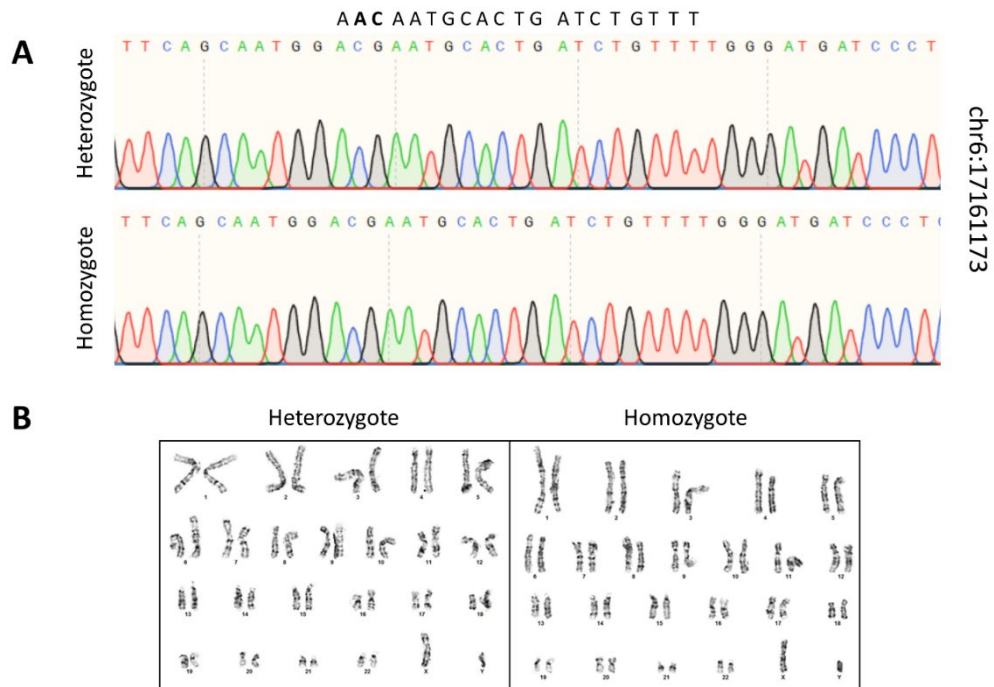

**Fig. S1.**

(A) Sanger sequencing results of *in silico* predicted off-target site at chr6:17161173 allowing 2 mismatches for the heterozygote and homozygote *FN1* clone. Sequence of gRNA is depicted above, where mismatches are depicted in bold. (B) Karyotypes of isogenic hiPSC lines heterozygous and homozygous for FN1 mutation, showing absence of chromosomal abnormalities.

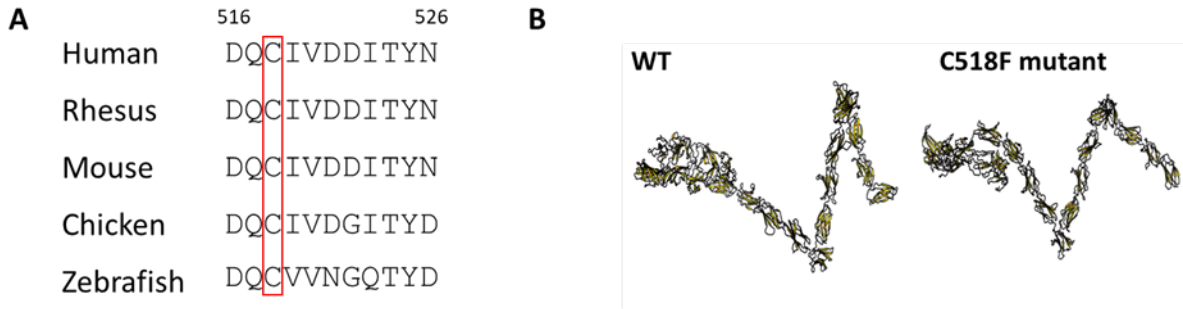

**Fig. S2.**

**Investigation of C518F fibronectin mutation.** (A) Alignment of the amino acid sequence around C518 of FN1, where the identified mutation is located. Mutated residue is outlined in red. (B) Structure prediction of wildtype (WT) and C518F mutant fibronectin by RaptorX of the 1,980 N-terminal amino acid residues.

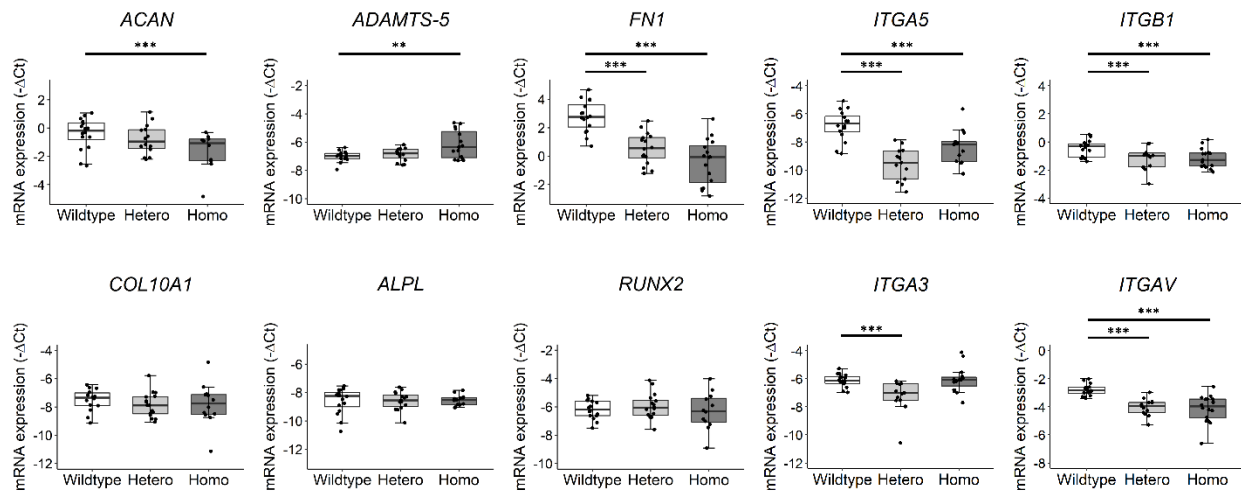

**Fig. S3.**

Boxplots of  $-\Delta\text{Ct}$  values of *ACAN*, *ADAMTS-5*, *FN1*, *ITGA5*, *ITGB1*, *COL10A1*, *ALPL*, *RUNX2*, *ITGA3*, *ITGAV* in wildtype, C518F FN1 hetero- (Hetero) and homozygous (Homo) chondrogenic pellets.  $-\Delta\text{Ct}$  values shown were corrected for *GAPDH* and *SDHA* expression levels. The boxplots represent 25th, 50th and 75th percentiles, and whiskers extend to 1.5 times the interquartile range. Independent samples are depicted by black dots in each graph. P values were determined by generalized estimation equations, with gene expression levels ( $-\Delta\text{Ct}$ ) as dependent variable and genotype as factor. \*  $P < 0.05$ , \*\*  $P < 0.01$ , \*\*\*  $P < 0.005$

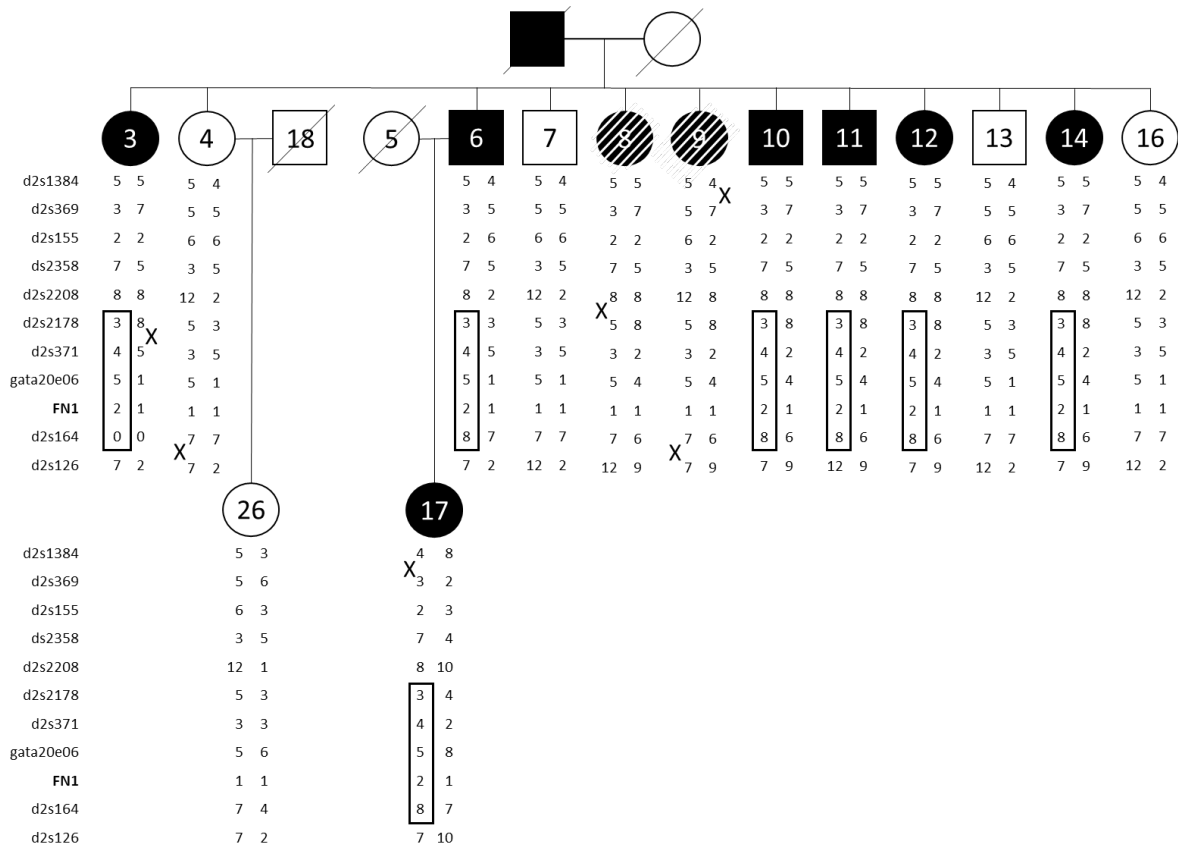

**Fig. S4.**

Pedigree of investigated early-onset osteoarthritis (OA) family, where co-segregating haplotypes among affected individuals are depicted as squared boxes and recombination as crosses. Individual 10 was used for exome sequencing. Circles represent females, squares represent males. Closed and open shapes represent affected respectively healthy individuals; striped shapes represent uncertain phenotypes.

**Table S1.**

Radiographic and clinical abnormalities in members of a family with early-onset OA.

| Patient # | Sex | Age of onset | DIJ | PIJ | MCJ | CMC | Elbow | Shoulder | Hip | Knee | Foot | Ankle | CS | LS | Confirmed ROA |
|-----------|-----|--------------|-----|-----|-----|-----|-------|----------|-----|------|------|-------|----|----|---------------|
| 3         | F   | 45           | +   | +   |     | OA  |       |          |     | OA   |      | OA    |    |    | Yes           |
| 4         | F   | -            | -   | -   | -   | -   | -     | -        | -   | -    | -    | -     | -  | -  | -             |
| 6         | M   | 40           | +   | +   |     |     |       |          |     | OA   | +    | +     |    |    | Yes           |
| 7         | M   | -            | -   | -   | -   | -   | -     | -        | -   | -    | -    | -     | -  | -  | -             |
| 8         | F   | 50           | +   | +   |     |     |       |          |     | +    |      |       | +  |    | No            |
| 9         | F   | 40           | +   | +   |     |     |       |          |     | +    | +    | +     |    |    | No            |
| 10        | M   | 43           | OA  | OA  | OA  |     | +     | +        |     | +    |      | OA    |    |    | Yes           |
| 11        | M   | 40           | +   | +   |     |     |       |          |     |      | +    | OA    | OA | OA | Yes           |
| 12        | F   | 39           | OA  | OA  | OA  |     |       |          | OA  | +    | +    | +     |    |    | Yes           |
| 13        | M   | -            | -   | -   | -   | -   | -     | -        | -   | -    | -    | -     | -  | -  | -             |
| 14        | F   | 28           | OA  | OA  | OA  |     |       |          |     | OA   |      | OA    |    | OA | Yes           |
| 15*       | F   | 30           | +   | +   | +   |     |       |          |     | +    |      |       |    |    | No            |
| 16        | F   | -            | -   | -   | -   | -   | -     | -        | -   | -    | -    | -     | -  | -  | -             |
| 17        | F   | 23           | H   | B   |     | OA  |       | -        | -   | OA   | -    | -     |    |    | Yes           |

F = female, M = male, OA = Radiographic osteoarthritis, Kellgren Lawrence grade 2 or higher in one or both joints, + = joint complaints, - = no x-ray available or no joint complaints, H = Heberden nodes, B = Bouchard nodes, DIJ = distal interphalangeal joints, PIJ = proximal interphalangeal joints, MCJ = metacarpophalangeal joint, CMC = carpometacarpal joint, CS = cervical spine, LS = lumbar spine, confirmed ROA = confirmed radiological OA.

\* patient 15 is a monozygotic twin with patient 14, since there was no confirmed ROA, patient 15 was removed from the linkage analysis

**Table S2.**

Variant prioritization scheme applied after exome sequencing.

|                                                                    | <b>Subject 10</b> |
|--------------------------------------------------------------------|-------------------|
| Total number of variants detected                                  | 73,407            |
| Exonic including 5'UTR and 3'UTR                                   | 20,062            |
| Missense, nonsense, readthrough, frame error, splice site          | 7,907             |
| Novel                                                              | 1,032             |
| Missense damaging, nonsense, readthrough, frame error, splice site | 122               |

**Table S3.**

List of damaging missense variants in an affected family member of an early-onset OA family after our applied prioritization scheme. Base change is base of the sense strand of the DNA.

| <b>Chromosome</b> | <b>Gene Name</b> | <b>Ensembl ID</b> | <b>Base change</b> | <b>Base position</b> | <b>Codon change</b> | <b>Substitution</b> |
|-------------------|------------------|-------------------|--------------------|----------------------|---------------------|---------------------|
| 1                 | CPSF3L           | ENSG00000127054   | A/G                | 1250997              | GTA-GcA             | V46A                |
| 1                 | RBMXL1           | ENSG00000213516   | T/G                | 89448812             | GAT-GcT             | D233A               |
| 1                 | ITGA10           | ENSG00000143127   | C/T                | 145530939            | ACG-AtG             | T224M               |
| 1                 | NBPF14           | ENSG00000122497   | C/A                | 148004625            | GTG-tTG             | V897L               |
| 1                 | ADAMTSL4         | ENSG00000143382   | G/A                | 150531177            | GAC-aAC             | D871N               |
| 1                 | LINGO4           | ENSG00000213171   | G/A                | 151774330            | TCC-TtC             | S284F               |
| 1                 | SELE             | ENSG00000007908   | A/T                | 169697065            | GTG-GaG             | V428E               |
| 1                 | C1orf129         | ENSG00000117501   | G/A                | 170961360            | GTG-aTG             | V362M               |
| 1                 | HEATR1           | ENSG00000119285   | A/G                | 236722383            | GTG-GcG             | V1527A              |
| 1                 | ZP4              | ENSG00000116996   | G/A                | 238050846            | ACC-AtC             | T190I               |
| 2                 | GPR113           | ENSG00000173567   | G/A                | 26534245             | GCG-GtG             | A784V               |
| 2                 | MOBKL1B          | ENSG00000114978   | A/G                | 74399827             | TCT-cCT             | S23P                |
| 2                 | DNAH6            | ENSG00000115423   | A/T                | 84899498             | ATG-tTG             | M2168L              |
| 2                 | MMADHC           | ENSG00000168288   | C/T                | 150436081            | GGT-GaT             | G79D                |
| 2                 | ALS2             | ENSG00000003393   | A/C                | 202590176            | TAT-gAT             | Y1084D              |
| 2                 | FN1              | ENSG00000115414   | C/A                | 216285518            | TGC-TtC             | C518F               |
| 2                 | ABCB6            | ENSG00000115657   | G/C                | 220075737            | CGT-gGT             | R688G               |
| 3                 | DNAH12           | ENSG00000174844   | G/C                | 57401178             | GCA-GgA             | A1924G              |
| 3                 | NEK11            | ENSG00000114670   | G/C                | 130748679            | GTC-cTC             | V43L                |
| 3                 | PAK2             | ENSG00000180370   | G/C                | 196529902            | CAG-CAc             | Q101H               |
| 4                 | MFSD10           | ENSG00000109736   | A/C                | 2935381              | TAT-gAT             | Y61D                |
| 4                 | MAN2B2           | ENSG00000013288   | T/A                | 6596307              | ATG-AaG             | M302K               |
| 4                 | TMPRSS11         | ENSG00000198092   | G/A                | 68930465             | TCT-TtT             | S318F               |
| 4                 | FAM13A           | ENSG00000138640   | A/C                | 89660254             | GTG-GgG             | V830G               |



|    |         |                 |     |           |         |        |
|----|---------|-----------------|-----|-----------|---------|--------|
| 4  | GPRIN3  | ENSG00000185477 | T/G | 90170862  | ACC-cCC | T134P  |
| 4  | NHEDC1  | ENSG00000164037 | A/C | 103832643 | CTG-CgG | L294R  |
| 4  | SEC24D  | ENSG00000150961 | G/A | 119678880 | CCA-tCA | P473S  |
| 4  | FRG1    | ENSG00000109536 | C/T | 190874234 | CCT-tCT | P91S   |
| 4  | FRG1    | ENSG00000109536 | C/A | 190878563 | GCT-GaT | A148D  |
| 5  | CDC20B  | ENSG00000164287 | G/A | 54423155  | CGG-tGG | R307W  |
| 5  | PPIC    | ENSG00000168938 | C/T | 122361517 | GGC-aGC | G158S  |
| 5  | LECT2   | ENSG00000145826 | C/T | 135287013 | GGA-GaA | G63E   |
| 5  | PCDHB8  | ENSG00000120322 | G/A | 140558064 | GGG-GaG | G150E  |
| 5  | ZNF354C | ENSG00000177932 | A/G | 178507004 | TAT-TgT | Y524C  |
| 6  | ZNF318  | ENSG00000171467 | G/A | 43307399  | CCA-CtA | P1446L |
| 7  | SDK1    | ENSG00000146555 | G/A | 4002375   | GGA-aGA | G441R  |
| 7  | HBP1    | ENSG00000105856 | G/C | 106836335 | CGC-CcC | R375P  |
| 7  | SLC26A3 | ENSG00000091138 | T/G | 107427841 | AAA-AAc | K283N  |
| 7  | CFTR    | ENSG00000001626 | C/T | 117188750 | TCT-TtT | S422F  |
| 7  | OR9A2   | ENSG00000179468 | A/C | 142723621 | GTT-GgT | V200G  |
| 7  | GALNT11 | ENSG00000178234 | T/C | 151810377 | GTA-GcA | V376A  |
| 7  | MLL3    | ENSG00000055609 | A/G | 151919751 | TGT-cGT | C1114R |
| 8  | PABPC1  | ENSG00000070756 | G/A | 101721812 | CGC-tGC | R374C  |
| 8  | PABPC1  | ENSG00000070756 | T/C | 101721817 | GAA-GgA | E372G  |
| 8  | PABPC1  | ENSG00000070756 | C/A | 101721839 | GTA-tTA | V365L  |
| 8  | FER1L6  | ENSG00000214814 | C/T | 124989741 | CGG-tGG | R319W  |
| 8  | PLEC    | ENSG00000178209 | A/G | 145003292 | CTG-CcG | L1217P |
| 8  | ZNF251  | ENSG00000198169 | T/C | 145979657 | GAG-GgG | E28G   |
| 9  | EXOSC3  | ENSG00000107371 | G/C | 37782053  | CGA-gGA | R186G  |
| 9  | NOTCH1  | ENSG00000148400 | T/C | 139390627 | AGC-gGC | S2522G |
| 10 | IL15RA  | ENSG00000134470 | G/A | 6008296   | ACG-AtG | T32M   |
| 10 | ARMC3   | ENSG00000165309 | A/G | 23250814  | GAT-GgT | D180G  |
| 10 | PLAU    | ENSG00000122861 | C/T | 75673437  | CGG-tGG | R165W  |
| 10 | LIPM    | ENSG00000173239 | C/A | 90579993  | ACT-AaT | T336N  |

|    |          |                 |     |           |         |        |
|----|----------|-----------------|-----|-----------|---------|--------|
| 10 | TM9SF3   | ENSG00000077147 | C/A | 98292928  | TGT-TtT | C402F  |
| 10 | CPXM2    | ENSG00000121898 | C/G | 125521390 | GGA-GcA | G592A  |
| 11 | OR51S1   | ENSG00000176922 | C/A | 4870162   | GCC-tCC | A93S   |
| 11 | DNHD1    | ENSG00000179532 | C/T | 6585157   | CGC-tGC | R3363C |
| 11 | OLFML1   | ENSG00000183801 | C/T | 7509386   | ACG-AtG | T53M   |
| 11 | SAA4     | ENSG00000148965 | T/A | 18254071  | GAC-GtC | D34V   |
| 11 | LGR4     | ENSG00000205213 | A/T | 27390683  | TTT-TTa | F529L  |
| 11 | BTBD18   | ENSG00000233436 | A/G | 57513573  | TTC-cTC | F58L   |
| 11 | ATM      | ENSG00000149311 | T/C | 108214007 | ATT-AcT | I2776T |
| 11 | CRYAB    | ENSG00000109846 | C/A | 111781098 | GTG-tTG | V93L   |
| 12 | FOXM1    | ENSG00000111206 | T/C | 2967952   | AAT-AgT | N753S  |
| 12 | PZP      | ENSG00000126838 | G/A | 9307415   | CGC-tGC | R1191C |
| 12 | SLC11A2  | ENSG00000110911 | G/C | 51384724  | CGG-gGG | R477G  |
| 12 | NUAK1    | ENSG00000074590 | C/A | 106460782 | CGC-CtC | R595L  |
| 13 | CCNA1    | ENSG00000133101 | G/A | 37014187  | CGA-CaA | R322Q  |
| 13 | KIAA1704 | ENSG00000133114 | G/T | 45589633  | GGT-tGT | G33C   |
| 14 | HEATR5A  | ENSG00000129493 | G/A | 31762650  | TCT-TtT | S1995F |
| 14 | RALGAPA1 | ENSG00000174373 | A/G | 36103797  | CTC-CcC | L1534P |
| 14 | MTHFD1   | ENSG00000100714 | A/C | 64884707  | ACC-cCC | T194P  |
| 14 | PLEKHG3  | ENSG00000126822 | C/T | 65198849  | CAC-tAC | H332Y  |
| 14 | DIO2     | ENSG00000211448 | T/C | 80669078  | GAG-GgG | E259G  |
| 14 | DDX24    | ENSG00000089737 | A/C | 94521529  | GTC-GgC | V664G  |
| 14 | CDC42BPB | ENSG00000198752 | C/G | 103410810 | GCT-cCT | A1276P |
| 14 | PACS2    | ENSG00000179364 | A/G | 105821407 | AGG-gGG | R106G  |
| 15 | HERC2    | ENSG00000128731 | G/A | 28483865  | CGC-tGC | R1211C |
| 15 | ARHGAP11 | ENSG00000198826 | G/C | 32921855  | GAT-cAT | D333H  |
| 15 | RYR3     | ENSG00000198838 | G/T | 34152828  | GAC-tAC | D4774Y |
| 15 | KIF23    | ENSG00000137807 | C/A | 69709740  | CCA-aCA | P34T   |
| 15 | AKAP13   | ENSG00000170776 | G/T | 86270411  | GTC-tTC | V2317F |
| 16 | RGS11    | ENSG00000076344 | T/C | 323545    | CAG-CgG | Q152R  |

|    |          |                 |     |          |         |        |
|----|----------|-----------------|-----|----------|---------|--------|
| 16 | TBL3     | ENSG00000183751 | A/G | 2024410  | AGC-gGC | S75G   |
| 16 | TSC2     | ENSG00000103197 | T/C | 2130361  | CTG-CcG | L1198P |
| 16 | ACSM5    | ENSG00000183549 | C/T | 20429546 | CGG-tGG | R124W  |
| 16 | ABCC11   | ENSG00000121270 | C/T | 48218359 | GTG-aTG | V1084M |
| 16 | SALL1    | ENSG00000103449 | C/T | 51171034 | GTC-aTC | V1322I |
| 16 | GLG1     | ENSG00000090863 | T/C | 74514287 | GAC-GgC | D560G  |
| 16 | KIAA1609 | ENSG00000140950 | A/G | 84531559 | TTC-TcC | F45S   |
| 17 | FAM57A   | ENSG00000167695 | G/A | 644611   | CGG-CaG | R160Q  |
| 17 | ALOX12B  | ENSG00000179477 | T/C | 7977033  | TAT-TgT | Y566C  |
| 17 | CCDC144A | ENSG00000170160 | G/A | 16664922 | GAA-aAA | E1186K |
| 17 | LGALS9C  | ENSG00000171916 | G/A | 18397608 | CGC-CaC | R333H  |
| 17 | TRAF4    | ENSG00000076604 | C/T | 27076578 | CGG-tGG | R466W  |
| 17 | SLFN11   | ENSG00000172716 | A/G | 33680081 | ATT-AcT | I667T  |
| 17 | CDC27    | ENSG00000004897 | A/C | 45216160 | GTT-GgT | V550G  |
| 17 | CDC27    | ENSG00000004897 | G/A | 45216182 | CTT-tTT | L543F  |
| 17 | ABCC3    | ENSG00000108846 | G/A | 48762223 | GGG-aGG | G1423R |
| 17 | PYCR1    | ENSG00000183010 | G/A | 79893008 | CGG-tGG | R112W  |
| 18 | DSG1     | ENSG00000134760 | C/T | 28934644 | CCT-tCT | P829S  |
| 19 | MATK     | ENSG00000007264 | C/G | 3779073  | GGC-cGC | G372R  |
| 19 | SH2D3A   | ENSG00000125731 | T/C | 6755228  | AGG-gGG | R199G  |
| 19 | XAB2     | ENSG00000076924 | A/G | 7685456  | TGC-cGC | C691R  |
| 19 | HAUS8    | ENSG00000131351 | C/T | 17170885 | GGA-aGA | G83R   |
| 19 | ISYNA1   | ENSG00000105655 | C/T | 18546943 | GCG-aCG | A90T   |
| 19 | ZNF98    | ENSG00000197360 | T/C | 22574988 | TAC-TgC | Y350C  |
| 19 | MEGF8    | ENSG00000105429 | T/C | 42855627 | TGG-cGG | W968R  |
| 19 | ZNF285   | ENSG00000062370 | C/T | 44890654 | GAG-aAG | E585K  |
| 19 | ZNF285   | ENSG00000062370 | G/C | 44891010 | GCG-GgG | A466G  |
| 19 | PPP1R13L | ENSG00000104881 | G/A | 45885802 | CCG-tCG | P385S  |
| 19 | DMWD     | ENSG00000185800 | T/C | 46290117 | AAG-gAG | K213E  |
| 19 | ZNF845   | ENSG00000213799 | T/C | 53856761 | TGT-cGT | C861R  |

|    |         |                 |     |           |         |       |
|----|---------|-----------------|-----|-----------|---------|-------|
| 19 | ZNF813  | ENSG00000198346 | T/C | 53995143  | TGT-cGT | C553R |
| 19 | ZNF543  | ENSG00000178229 | C/T | 57839675  | CCT-CtT | P282L |
| 20 | XKR7    | ENSG00000101321 | C/G | 30556211  | GCG-GgG | A78G  |
| 21 | TSPEAR  | ENSG00000175894 | T/C | 45941975  | AGT-gGT | S453G |
| 22 | SOX10   | ENSG00000100146 | T/C | 38374107  | GAG-GgG | E155G |
| 22 | L3MBTL2 | ENSG00000100395 | G/C | 41615519  | GCC-cCC | A233P |
| 22 | SCUBE1  | ENSG00000159307 | C/T | 43604155  | CGC-CaC | R886H |
| X  | MAGEA6  | ENSG00000197172 | A/C | 151870145 | ATT-cTT | I279L |

**Table S4.**

Genotyping of the detected FN1 variant in FOA family members.

| Patient # | Status               | FN1 - C518F |
|-----------|----------------------|-------------|
| 3         | Affected             | C A         |
| 4         | Unaffected           | C C         |
| 6         | Affected             | C A         |
| 7         | Unaffected           | C C         |
| 8         | Diagnostic uncertain | C C         |
| 9         | Diagnostic uncertain | C C         |
| 10        | Affected             | C A         |
| 11        | Affected             | C A         |
| 12        | Affected             | C A         |
| 13        | Unaffected           | C C         |
| 14        | Affected             | C A         |
| 16        | Unaffected           | C C         |
| 17        | Affected             | C A         |

**Table S5.**

Design of CRISPR/Cas9 system. In the single-strand oligonucleotide template the introduced silent mutation to give a HincII restriction site is depicted in italic font and the restriction site is shown in grey, the wanted FN1 mutation is depicted in bold font, and the mutated PAM site is depicted underlined.

|                                        |                                                                                                                                                                                                                          |
|----------------------------------------|--------------------------------------------------------------------------------------------------------------------------------------------------------------------------------------------------------------------------|
| guide RNA                              | 5'- AACAAUGCACUGAUCUGUUU-3'                                                                                                                                                                                              |
| single-strand oligonucleotide template | 5'-CAG CAT GTG CCC CTC TTC ATG ACG CTT GTG GAA TGT<br>GTC GTT CAC ATT GTA AGT GAT GTC <b>GTC AAC</b> AAT GAA<br>CTG ATC TGT TTA <u>CGA</u> AAC AGG TGG GTG AGT GAG AAA<br>CTT TTT AAA GTT CCA TTG ATG AAA GAA AAA AGG-3' |

**Table S6.**

Primer sequences to measure mRNA expression levels, amplify region of interest around FN1 mutation (exon 11), and amplify off-target region.

| <b>Region of interest</b> | <b>Forward primer (5' --&gt; 3')</b> | <b>Reverse primer (5' --&gt; 3')</b> |
|---------------------------|--------------------------------------|--------------------------------------|
| <i>ACAN</i>               | AGAGACTCACACAGTCGAAACAGC             | CTATGTTACAGTGCTCGCCAGTG              |
| <i>ADAMTS-5</i>           | GTGGTGAAGGTGGTGGTGCT                 | CTCATGGTCATCTCCCAGCTG                |
| <i>ALPL</i>               | CAAAGGCTTCTTCTTGCTGGTG               | CCTGCTTGGCTTTTCCTTCA                 |
| <i>COL1A1</i>             | GTGCTAAAGGTGCCAATGGT                 | ACCAGGTCACCGCTGTTAC                  |
| <i>COL2A1</i>             | CTACCCCAATCCAGCAAACGT                | AGGTGATGTTCTGGGAGCCTT                |
| <i>COL10A1</i>            | GGCAACAGCATTATGACCCA                 | TGAGATCGATGATGGCACTCC                |
| <i>FN1</i>                | CCGACCAGAAGTTTGGGTTC                 | CACGACCATTCCCAACACAC                 |
| <i>GAPDH</i>              | TGCCATGTAGACCCCTTGAAG                | ATGGTACATGACAAGGTGCGG                |
| <i>ITGA5</i>              | GTCGGGGGCTTCAACTTAGAC                | AGCACACTGACCCCGTCTG                  |
| <i>ITGA3</i>              | TGCCTACAAGTGGAAAGGAAAC               | CTGCCTACCTGCATCGTGTA                 |
| <i>ITGAV</i>              | TCTCTCGGGACTCCTGCTAC                 | AAGAAACATCCGGGAAGACGC                |
| <i>ITGB1</i>              | AGCGAAGGCATCCCTGAAAG                 | AATGTCTACCAACACGCCCT                 |
| <i>MCAM</i>               | GGAAGTCACCGTCCCTGTTT                 | ATGCTGAAGTGTGGTGGAGG                 |
| <i>PDGRFβ</i>             | GGACATACCCCCGCAAAGAA                 | CTCTCCGTCACATTGCAGGT                 |
| <i>SDHA</i>               | TGGGAACAAGAGGGCATCTG                 | GCCTACCACCACTGCATCAA                 |
| <i>RUNX2</i>              | CTGTGGTTACTGTCATGGCG                 | AGGTAGCTACTTGGGGAGGA                 |
| <i>FN1 (exon 11)</i>      | TGGCTTCTCACAGGAAAGTGT                | CCAGACGACTACCAATATCGAG               |
| gRNA off-target           | AGTGAAGGAGATGTGGCTGC                 | AAGAGCAACGGGGTGAACAA                 |
